# Supplementary material for: Host Transcription Profile in Nasal Epithelium and Whole Blood of Hospitalized Children Under 2 Years of Age With Respiratory Syncytial Virus Infection
Source: PubMed Central journal article supplement (PMC5853303; doi:10.1093/infdis/jix519), 2017-09-27

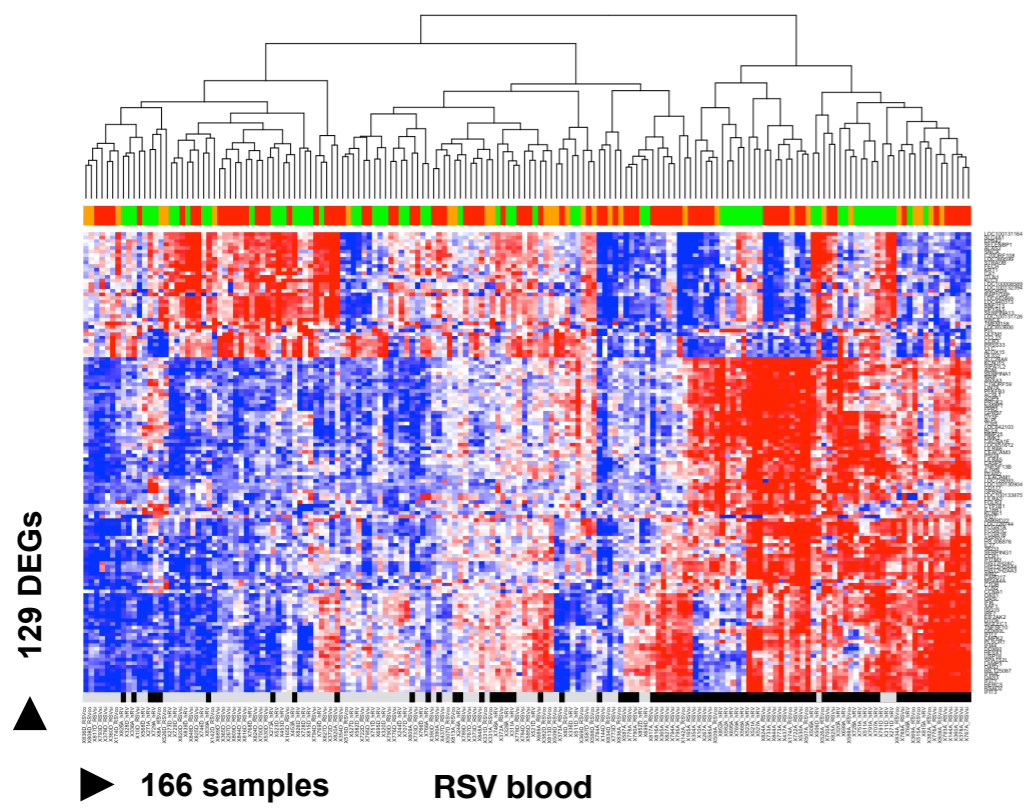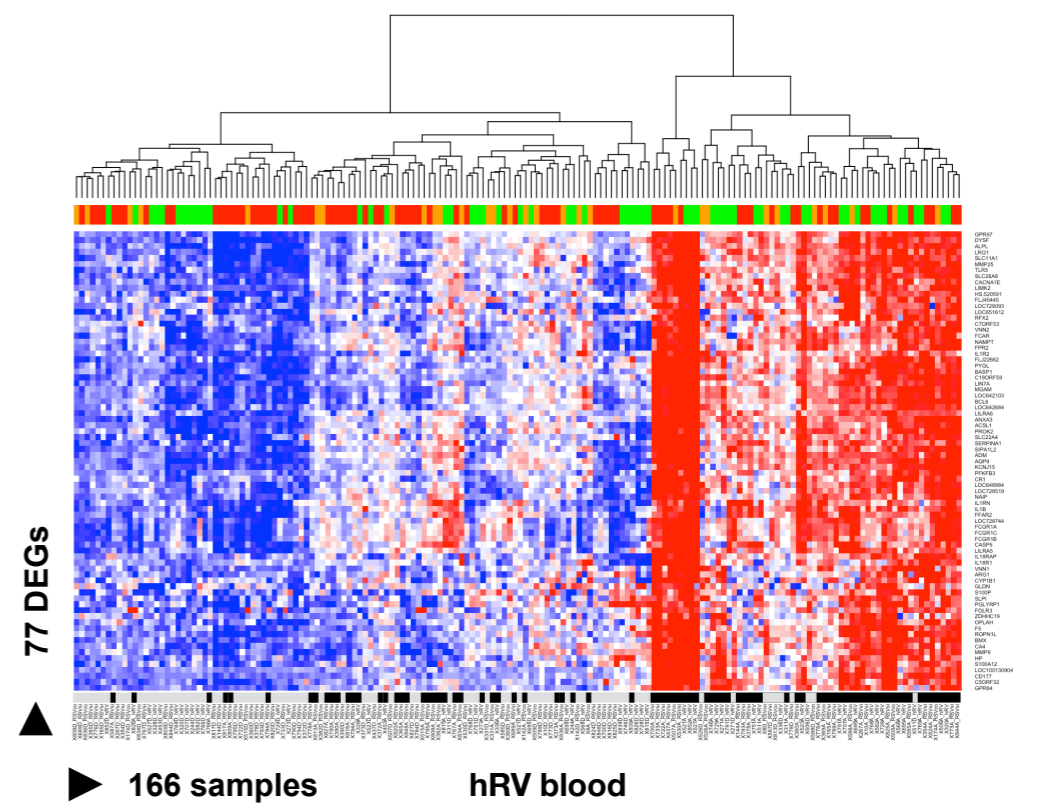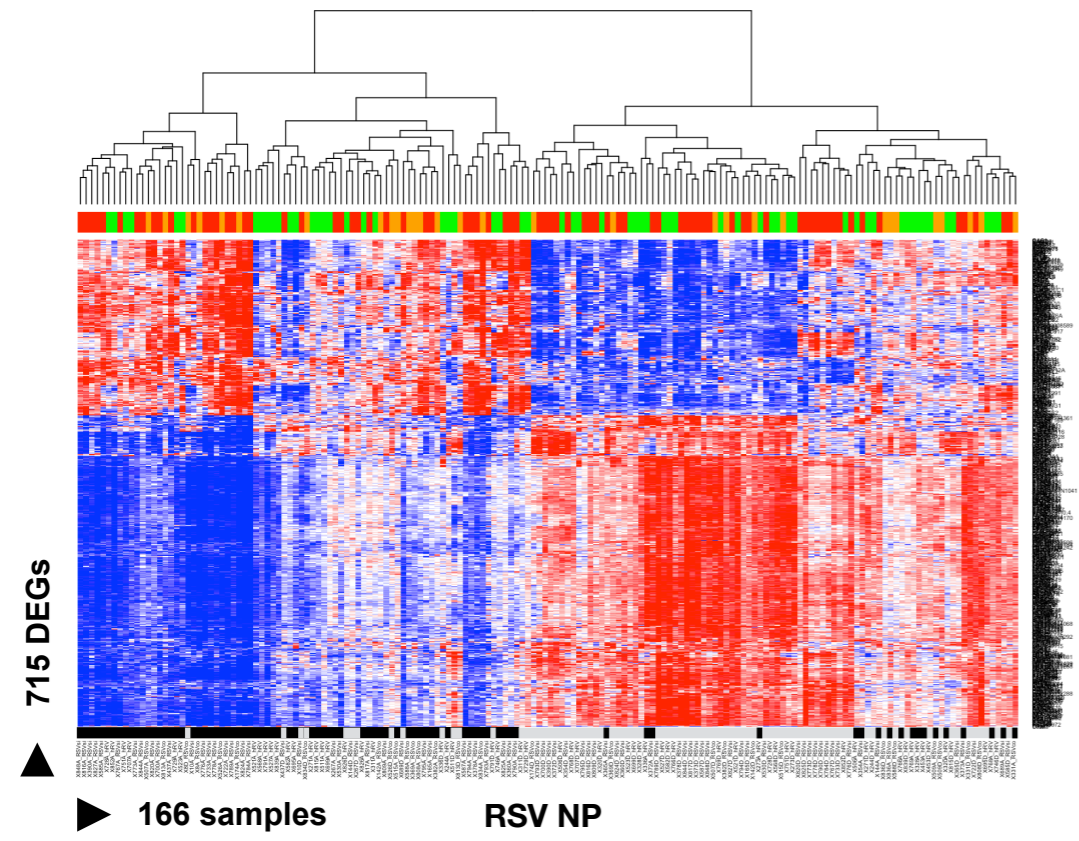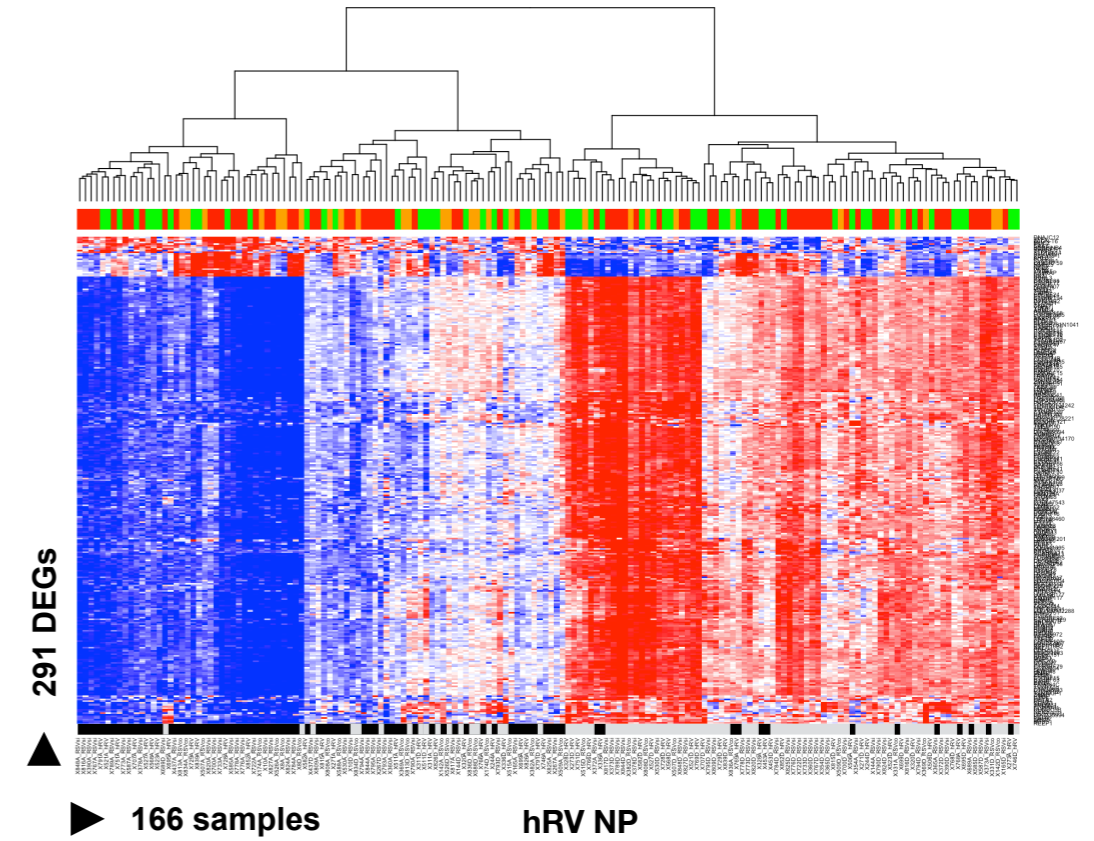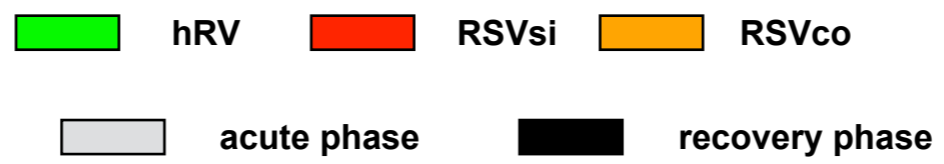

Supplement: jix519_suppl_revision_supp_figure3.pdf [file jix519_suppl_revision_supp_figure3.pdf]
